# Supplementary material for: An anthraquinone-based oxime ester as a visible-light photoinitiator for 3D photoprinting applications
Source: Royal Society of Chemistry journal article supplement (doi:10.1039/d3py00681f), 2023-01-01
Supplement: d3py00681f1.pdf [file d3py00681f1.pdf]

**SUPPORTING INFORMATION**

**Anthraquinone-based oxime ester as visible-light  
photoinitiator for 3D photoprinting applications**

Christine Elian , Nil Sanosa, Nicolas Bogliotti, Christian Herrero, Diego  
Sampedro, Davy-Louis Versace

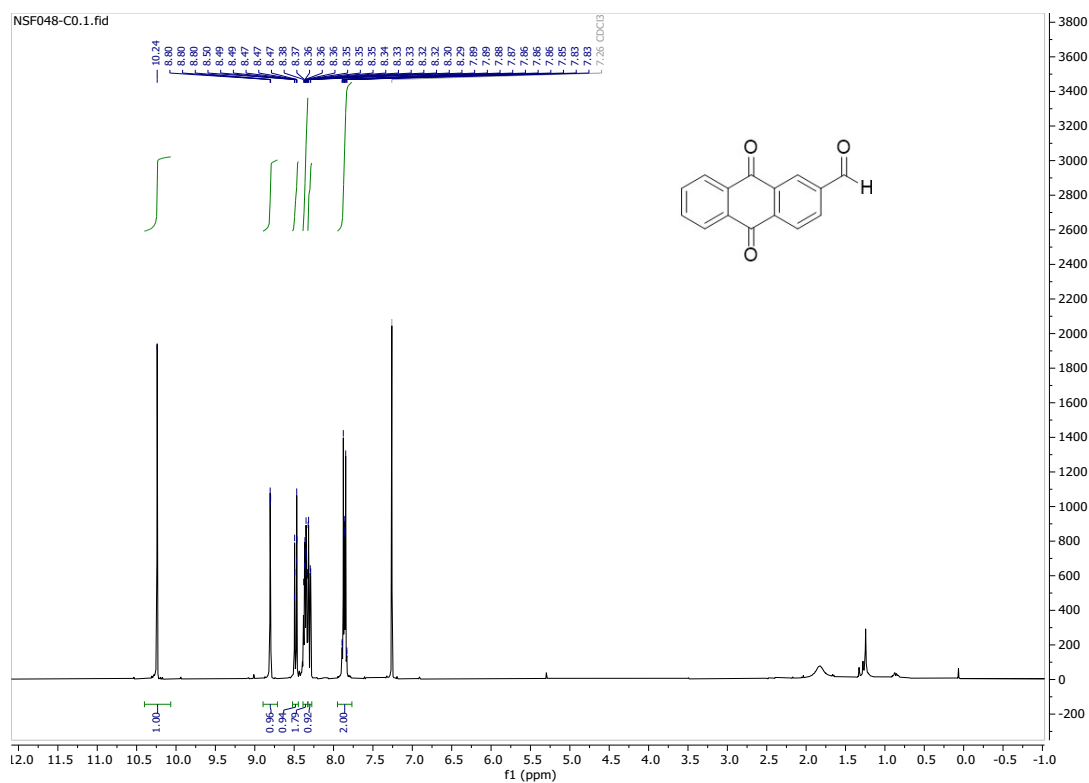

**Figure S1:**  $^1\text{H}$  NMR (300 MHz) spectrum for 9,10-dioxo-9,10-dihydroanthracene-2-carbaldehyde (II) ( $\text{CDCl}_3$  as a solvent).

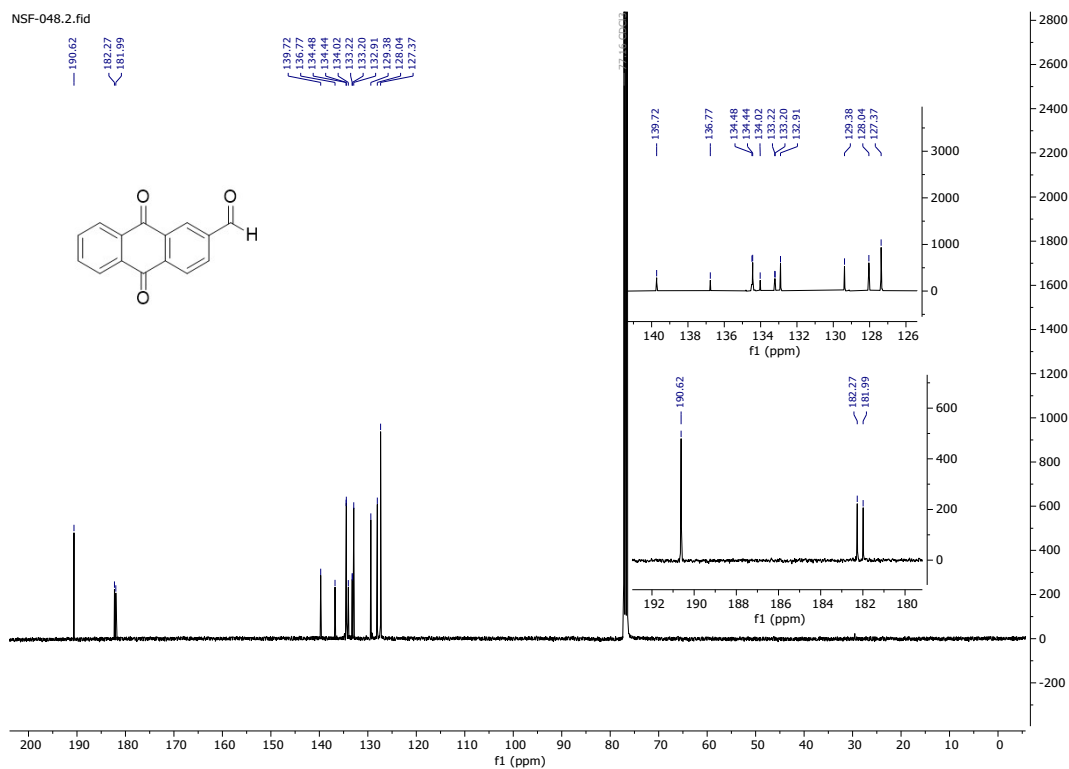

**Figure S2:**  $^{13}\text{C}$  NMR (101 MHz) spectrum for 9,10-dioxo-9,10-dihydroanthracene-2-carbaldehyde (II) ( $\text{THF-d}_8$  as a solvent).

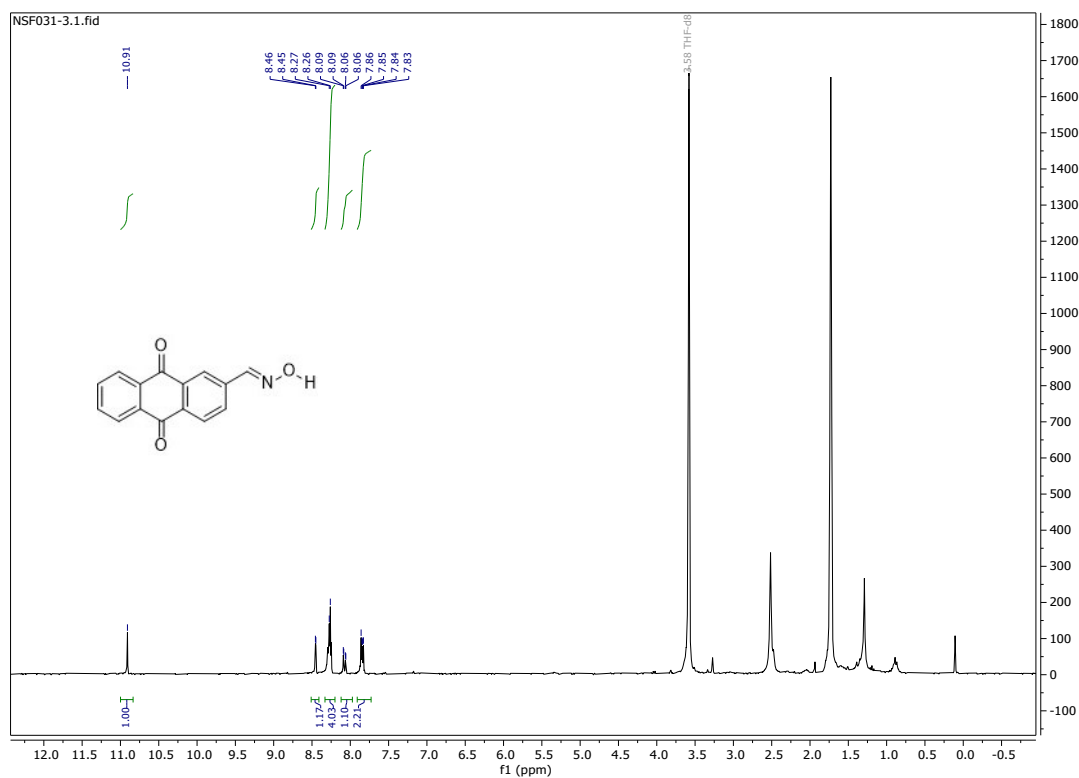

**Figure S3:**  $^1\text{H}$  NMR (300 MHz) spectrum for (*E*)-9,10-dioxo-9,10-dihydroanthracene-2-carbaldehyde oxime (III) (THF- $\text{d}^8$  as a solvent).

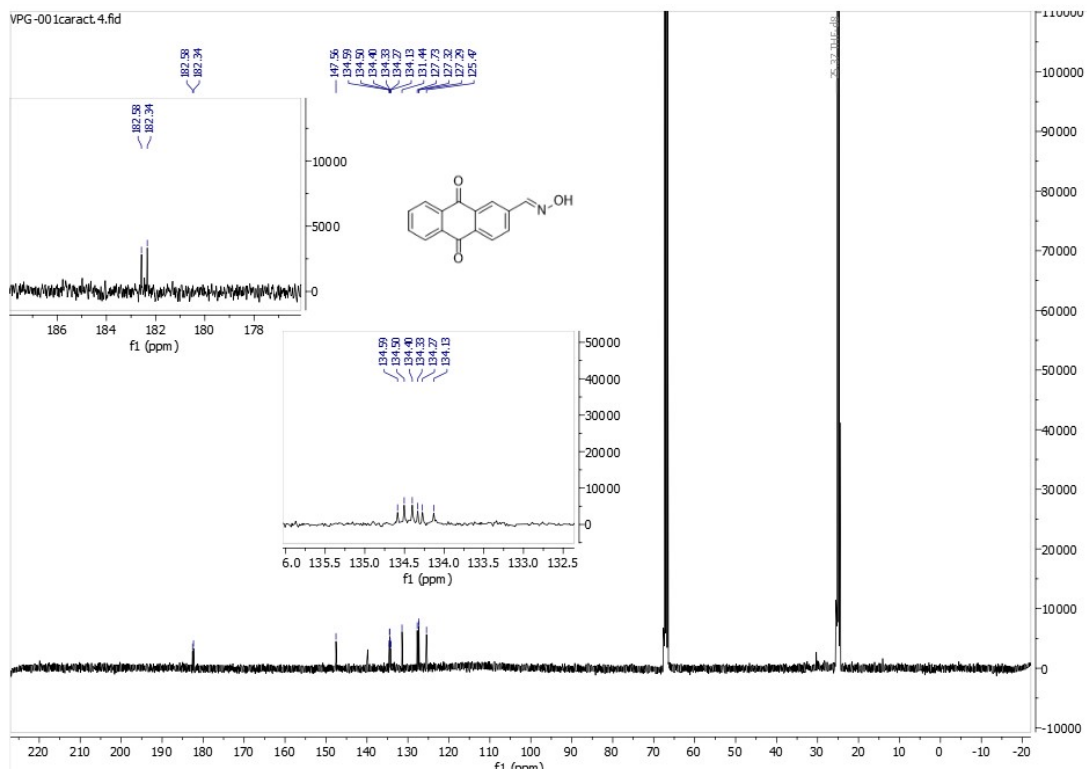

**Figure S4:**  $^{13}\text{C}$  NMR (101 MHz) spectrum for (*E*)-9,10-dioxo-9,10-dihydroanthracene-2-carbaldehyde oxime (III) (THF- $\text{d}^8$  as a solvent).

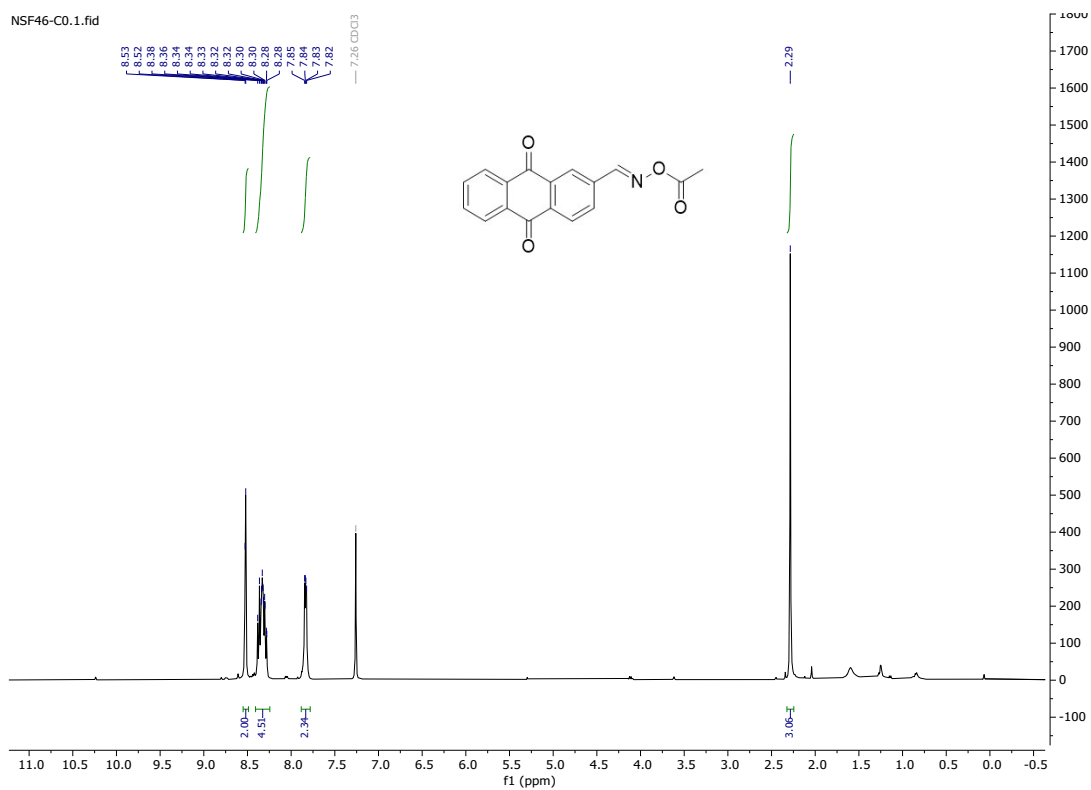

**Figure S5:** <sup>1</sup>H NMR (300 MHz) spectrum for (E)-9,10-dioxo-9,10-dihydroanthracene-2-carbaldehyde O-acetyl oxime (IV) (CDCl<sub>3</sub> as a solvent).

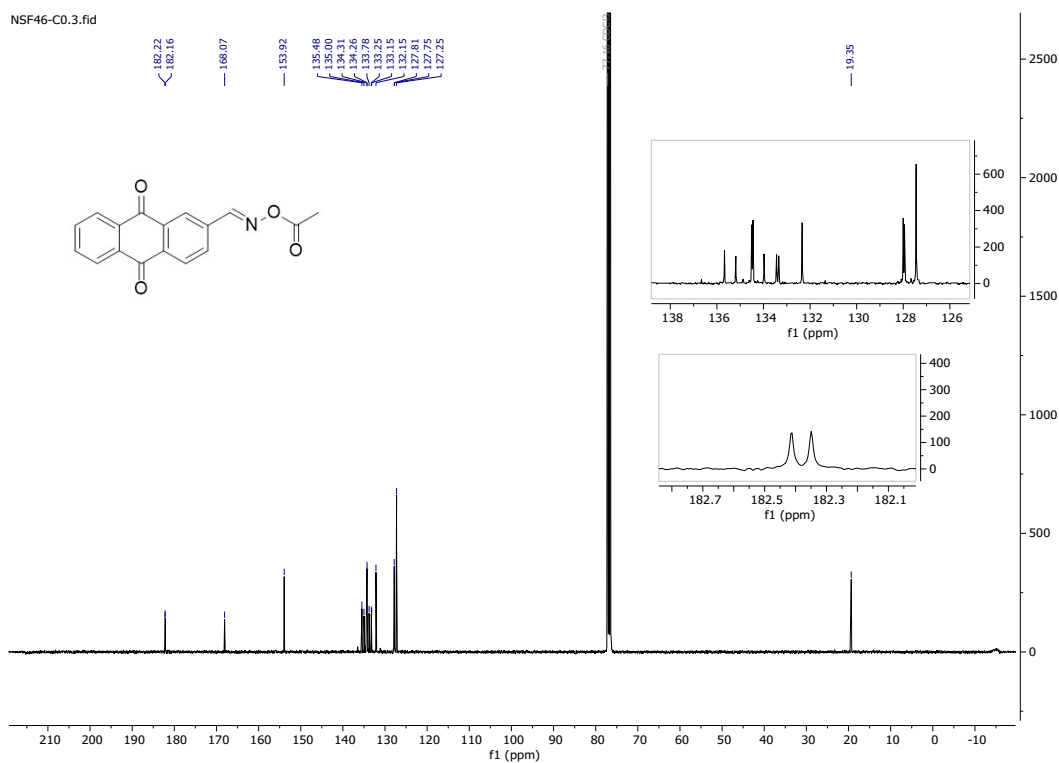

**Figure S6:** <sup>13</sup>C NMR (101 MHz) spectrum for (E)-9,10-dioxo-9,10-dihydroanthracene-2-carbaldehyde O-acetyl oxime (IV) (CDCl<sub>3</sub> as a solvent).

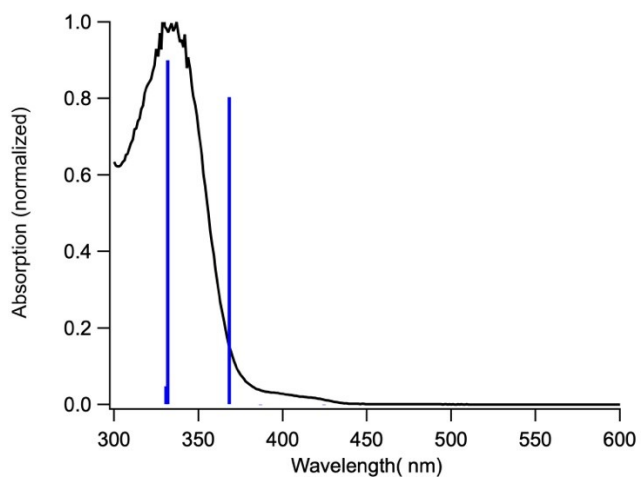

**Figure S7.** Normalized experimental UV-vis absorption spectrum of AQ-Ox in  $\text{CH}_2\text{Cl}_2$  (black curve) and electronic transitions calculated by TD-DFT (blue lines, height is proportional to oscillator strength).

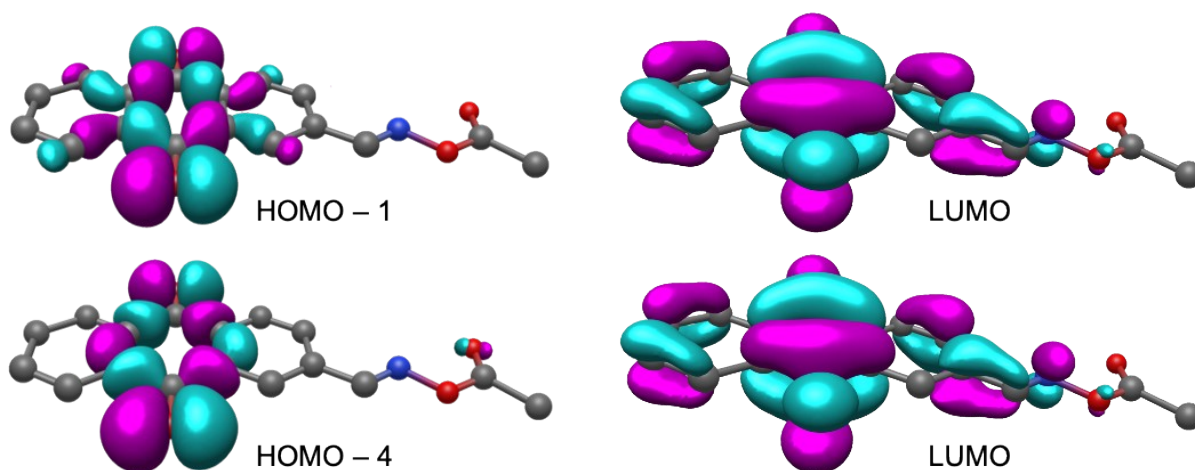

**Figure S8.** Main orbital pairs contributors for the electronic transitions calculated at 425 nm (top) and 387 nm (bottom).

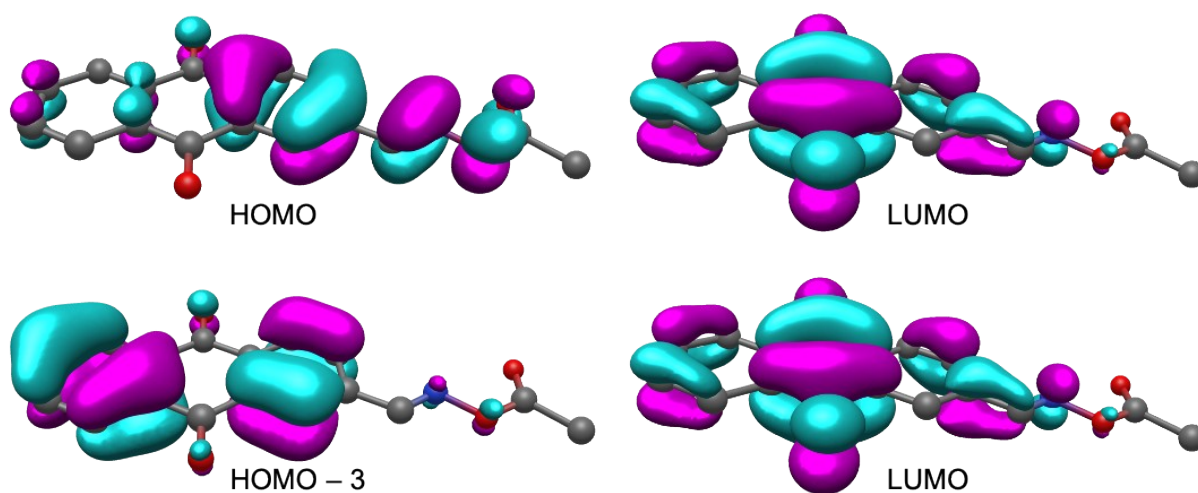

**Figure S9.** Main orbital pairs contributors for the electronic transitions calculated at 368 nm (top) and 332 nm (bottom).

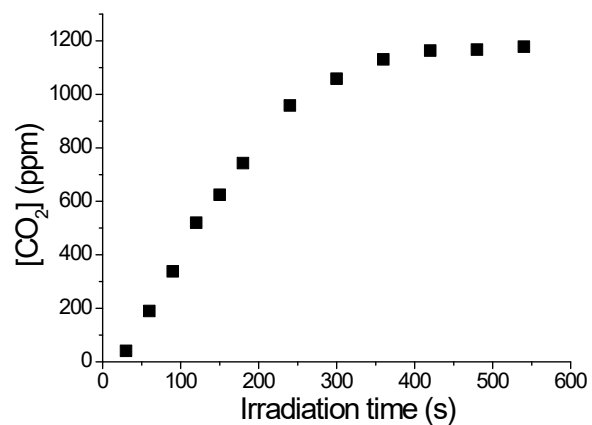

**Figure S10.** Micro-GC experiments. Formation of CO<sub>2</sub> under LED@405 nm irradiation of a DCM solution of AQ-Ox. [AQ-Ox] = 1.2 mg in 1.5 mL DCM solution. Intensity of LED@405 nm irradiation = 25 mW/cm<sup>2</sup>

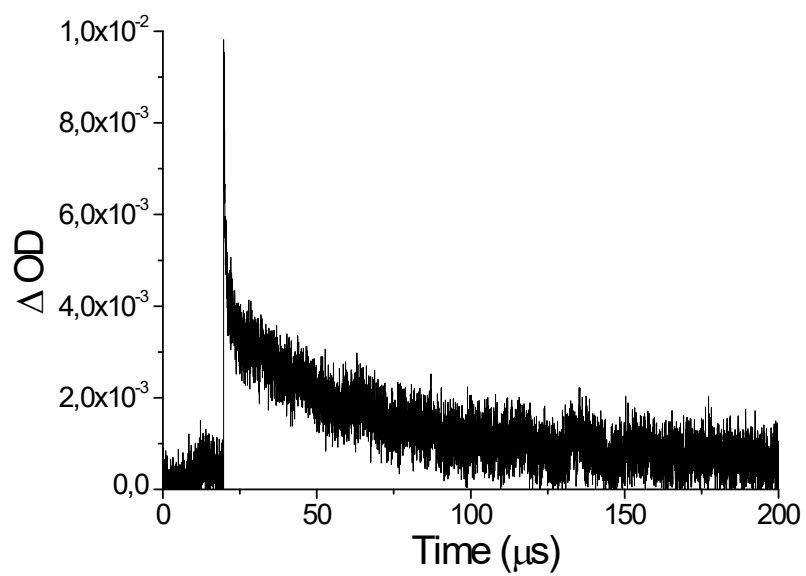

**Figure S11.** Transient absorption spectrum of the iminyl radicals at 300 nm after irradiation of a DCM solution of AQ-Ox.  $\lambda_{ex} = 266$  nm.
